# Supplementary material for: Development of rat duodenal monolayer model with effective barrier function from rat organoids for ADME assay
Source: PubMed Central journal article supplement (PMC10372144; doi:10.1038/s41598-023-39425-7), 2023-07-26
Supplement: 41598_2023_39425_MOESM1_ESM.pdf [file 41598_2023_39425_MOESM1_ESM.pdf]

## Supplemental Information

Development of rat duodenal monolayer model with effective barrier function from rat organoids for ADME assay

### Authors

Kai Tanaka<sup>1\*</sup>, Shigeto Kawai<sup>1</sup>, Etsuko Fujii<sup>2</sup>, Masumi Yano<sup>2</sup>, Takashi Miyayama<sup>2</sup>, Kiyotaka Nakano<sup>1</sup>, Kimio Terao<sup>3</sup>, Masami Suzuki<sup>4</sup>

### Affiliations

<sup>1</sup>Translational Research Division, Chugai Pharmaceutical Co., Ltd., 5-1-1 Tsukiji Chuo-ku, Tokyo 104-0045, Japan. <sup>2</sup>Translational Research Division, Chugai Pharmaceutical Co., Ltd., 216 Totsuka Totsuka-ku Yokohama, Kanagawa 244-8602, Japan. <sup>3</sup>Translational Research Division, Chugai Pharmaceutical Co., Ltd., 2-1-1 Nihonbashi-Muromachi Chuo-ku, Tokyo 103-8324, Japan. <sup>4</sup>Chugai Pharmaceutical Co., Ltd., 1-135 Komakado, Gotemba, Shizuoka 412-8513, Japan  
\*email: tanaka.kai11@chugai-pharm.co.jp

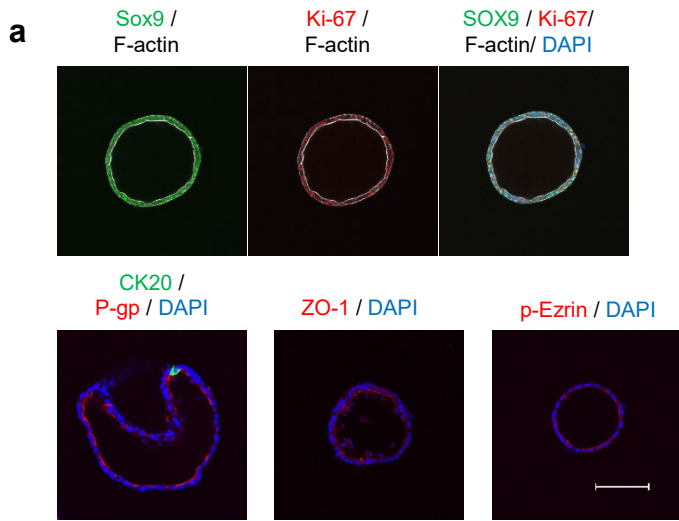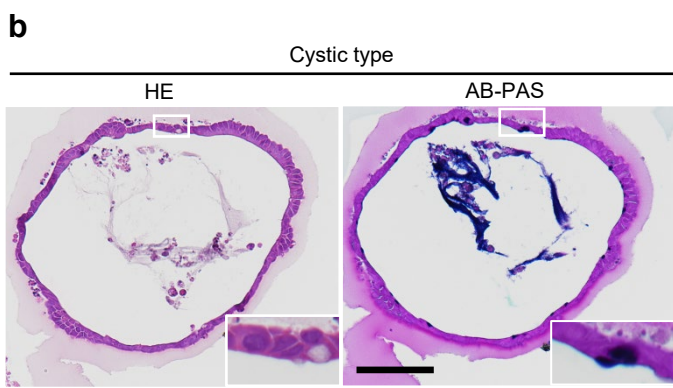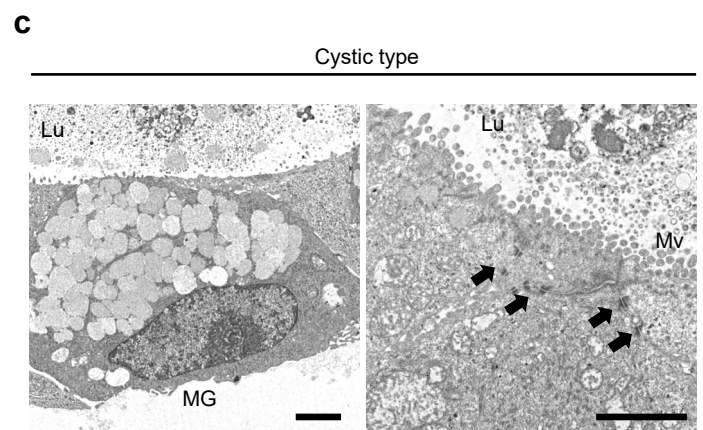

**Supplemental Figure S1.**

Characterization of rat duodenal organoid of cystic type. (a) Whole mount immunostaining of cystic type for Sox9 (green) and F-actin (white), Ki-67 (red) and F-actin (white), merge with DAPI (blue), CK20 (green) and P-gp (red) with DAPI (blue), ZO-1 (red) and DAPI (blue), phospho-Ezrin (p-Ezrin, red) and DAPI (blue). Scale bar = 100  $\mu$ m (b) Day 4 organoids sections were stained with HE, AB-PAS. Scale bar = 100  $\mu$ m. (c) Transmission electron microscopy of organoids on day 4. Arrows, desmosomes; MG, Matrigel; Mv, microvilli; Lu, Lumen. Scale bar = 2.0  $\mu$ m.

Well 1

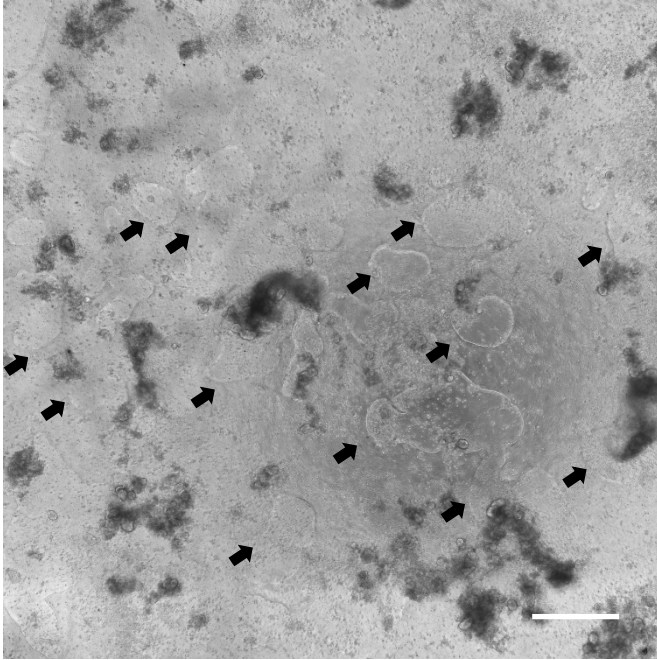

Well 2

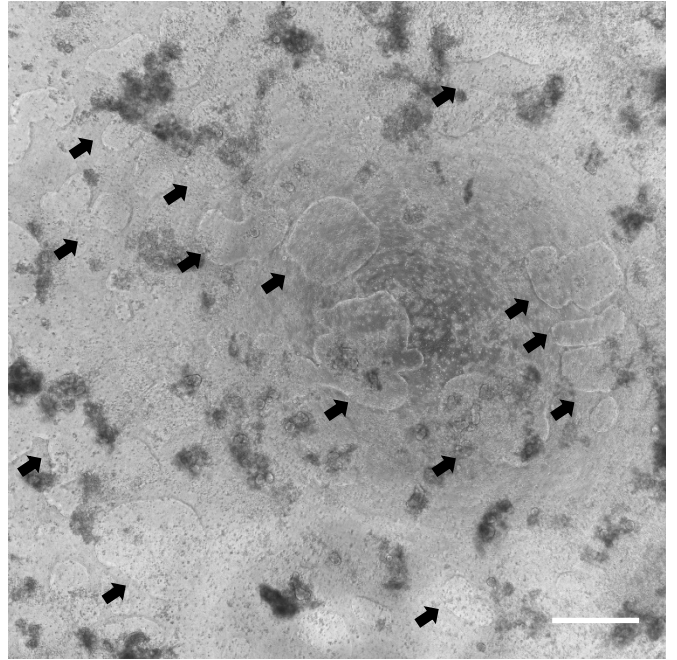

**Supplemental Figure S2.**

Day 7 monolayer culture generated by conventional rat organoids. Arrows show the cell absence area.

Scale bar = 500  $\mu\text{m}$

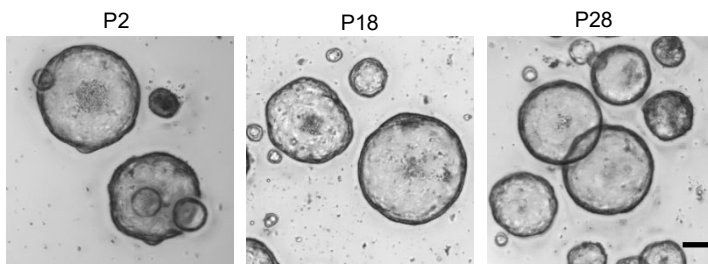

**Supplemental Figure S3.**

Representative images of long-term cultured cyst-enriched organoids.

Scale bar = 100  $\mu$ m

**Supplemental Table S1.** Primers used for quantitative RT-PCR analysis

| Gene          | Forward primer           | Reverse primer            |
|---------------|--------------------------|---------------------------|
| <i>Si</i>     | TGTTCCCTAAGGCTCGATGGTTTG | TTAGATGCGTGTTCCGTGCTG     |
| <i>Abcb1a</i> | AGATCGTGAAGGCAGCCAAG     | AGAAGTAAGATGTGAGGCTGTCTGA |
| <i>Abcb1b</i> | TGACTCGGGAGCAGAAGTTTGA   | GGCGAAGGTGATCCCAAAGA      |
| <i>Abcc2</i>  | TGAGCACCAGCAGCGATTTTC    | GAAGACGACCAAGTTTCCAACCA   |
| <i>Cyp1a1</i> | GTCCCGGATGTGGCCCTTCTCAAA | TAACTCTTCCCTGGATGCCTTCAA  |
| <i>Cyp3a9</i> | TTGTACGATGGTCGACAGCC     | CCACTGGACCAAAGTTCCGT      |
| <i>Act-b</i>  | GGAGATTACTGCCCTGGCTCCTA  | GACTCATCGTACTCCTGCTTGCTG  |
